# Supplementary material for: Cytochrome c assembly on fullerene nanohybrid metal oxide ultrathin films
Source: Royal Society of Chemistry journal article supplement (doi:10.1039/c5ra21928k), 2016-01-01
Supplement: c5ra21928k1.pdf [file c5ra21928k1.pdf]

## Supporting Information Available

# Cytochrome *c* Assembly on Fullerene Nanohybrid Metal Oxide Ultrathin film

Do-Hyeon Yang<sup>a, b</sup>, Min Jae Shin<sup>c</sup>, Sung Mook Choi<sup>b</sup>,  
Chang-Soo Lee<sup>d, e, \*</sup>, and Jae Sup Shin<sup>a, \*\*</sup>

<sup>a</sup>*Department of Chemistry, Chungbuk National University, 48 Gaeshin-dong, Cheongju, Chungbuk, 361- 763, Korea*

<sup>b</sup>*R&D Lab., PNS Technologies, Inc., 301 Yeonsung University, 34, Yanghwa-ro 37 beon-gil, Manan-gu, Anyang-si, Gyeonggi-do, 439-730, Korea*

<sup>c</sup>*Department of Chemistry and Biomolecular Engineering, Korea Advanced Institute of Science and Technology (KAIST), Daejeon 305- 806, Korea*

<sup>d</sup>*Bionanotechnology Research Center, Korea Research Institute of Bioscience & Biotechnology, 125 Gwahangno, Yuseong-gu, Daejeon 305-806, Korea*

<sup>e</sup>*Nanobiotechnology (Major), University of Science & Technology (UST), 217 Gajeong-ro, Yuseong-gu, Daejeon 305-350, Korea*

### **QCM Measurements.**

A quartz crystal microbalance (QCM, 9 MHz) electrode manufactured by USI System, Japan, was used for monitoring film assembly and working electrode. The mass increase due to adsorption can be estimated from the QCM frequency shift by using Sauerbrey equation [50]. The following relationship is obtained between adsorbed mass,  $M$ (g), and frequency shift,  $\Delta F$  (Hz), by taking into account the characteristics of used quartz resonators:

$$\Delta F \text{ (Hz)} = -1.832 \times 10^{-8} M / A \quad (1)$$

, where  $A$  is the surface area of the resonator (0.159 cm<sup>2</sup>). In our system, a frequency shift of 1-Hz corresponds to a mass increase of ca. 0.9 ng. The thickness ( $d$ , Å) of an adsorbed film on one side of a resonator is given by

$$2d = \Delta F / 1.832\rho \quad (2)$$

, where  $\rho$  is the density (g/cm<sup>3</sup>) of the adsorbed film.

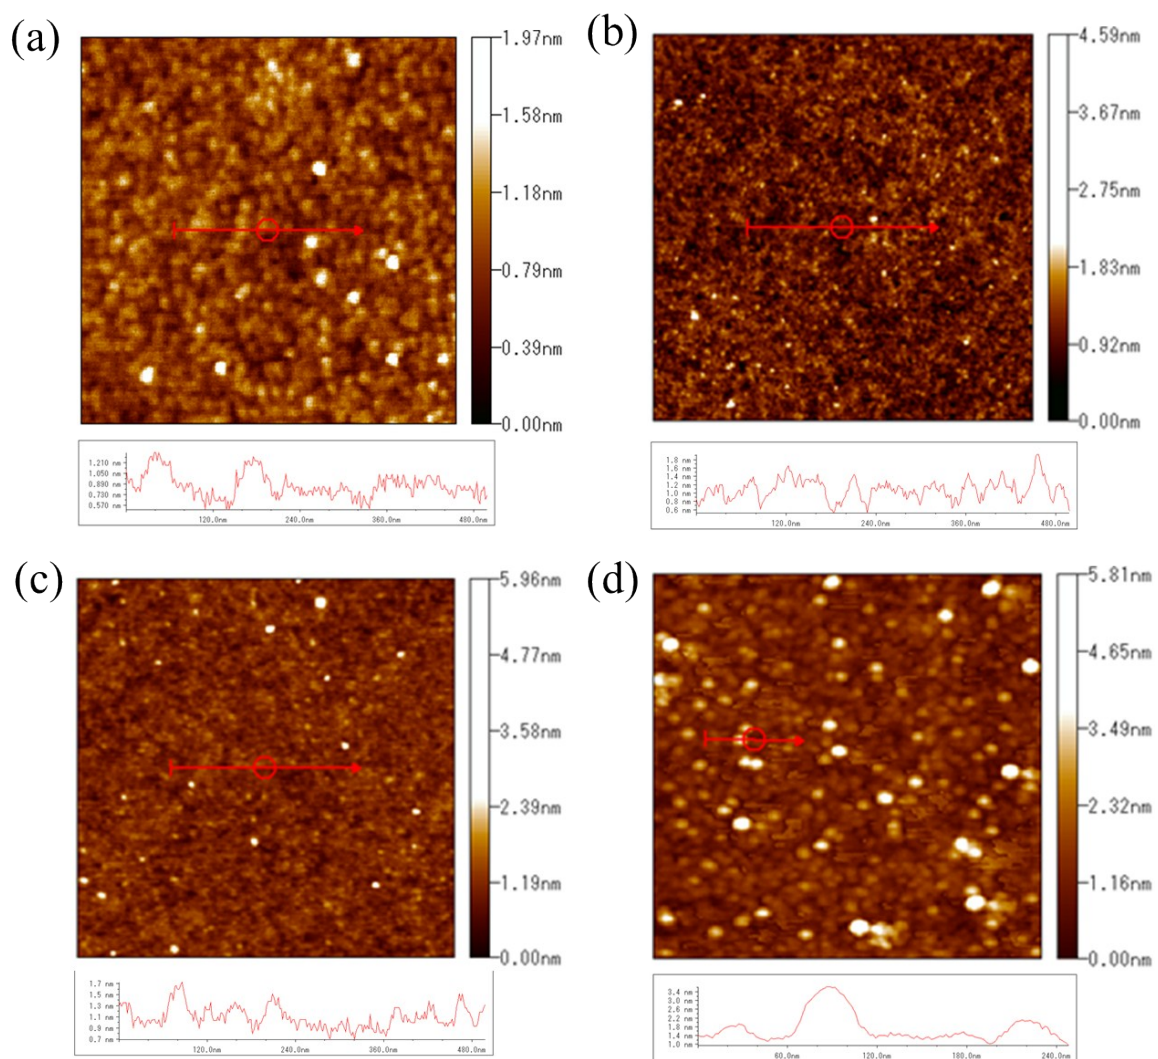

**Figure S1.** 2D AFM images of the  $1\ \mu\text{m} \times 1\ \mu\text{m}$  of the 1-cycle (a)  $\text{TiO}_2$ , (b)  $\text{TiO}_2/\text{C}_{60}$ , (c)  $\text{TiO}_2/\text{C}_{60}/\text{TiO}_2$ , and (d)  $(\text{TiO}_2/\text{C}_{60}/\text{TiO}_2)/\text{Cyt}$ . *c* layers deposited on a plasma treated silicon substrate, respectively.

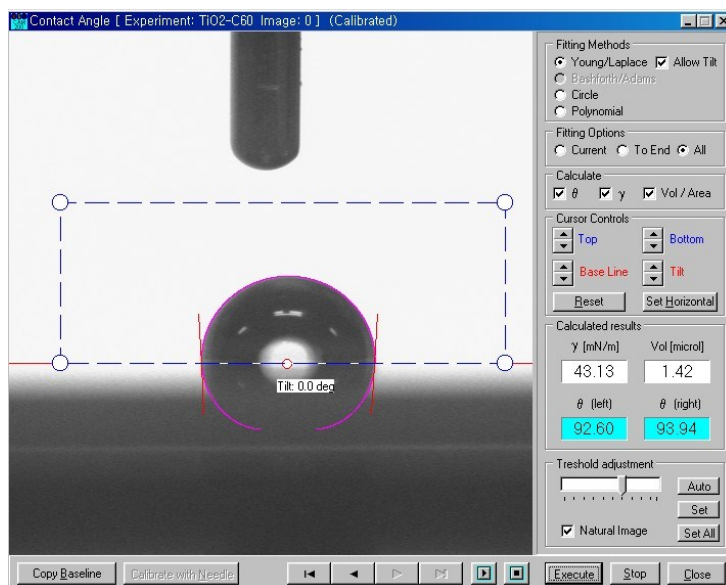

**Figure S2.** Micrograph of surface contact angle of the outmost C<sub>60</sub> layer deposited on a quartz palate.

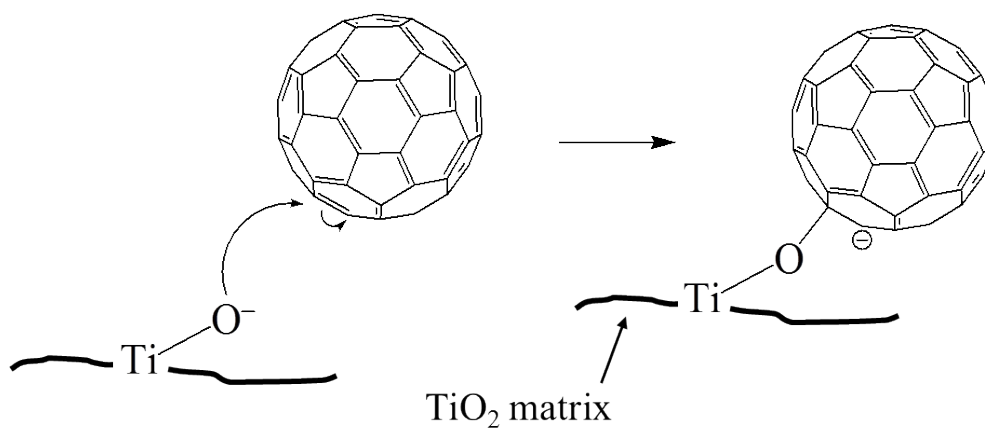

**Figure S3.** Schematic illustration of the covalent bonding between C<sub>60</sub> and TiO<sub>2</sub> gel layer.
